# Supplementary material for: Exploring the possible causal role of the immune response to varicella-zoster virus on multiple traits: a phenome-wide Mendelian randomization study
Source: medRxiv preprint, doi:10.1101/2022.07.29.22278202, version 1 (2022-07-31)
Supplement: Supplementary file 1 [file 278202_file06.docx]

**Exploring the possible causal role of the immune response to varicella-zoster virus on multiple traits: a phenome-wide Mendelian randomization study**

Xinzhu Yu1, Artitaya Lophatananon2, Krisztina Mekli2, Kenneth R. Muir2,#, Hui Guo1,#,*

1 Centre for Biostatistics, Division of Population Health, Health Services Research & Primary Care, School of Health Sciences, Faculty of Biology, Medicine and Health, The University of Manchester, Oxford Road, Manchester M13 9PL, United Kingdom

2 Centre for Integrated Genomic Medicine, Division of Population Health, Health Services Research & Primary Care, School of Health Sciences, Faculty of Biology, Medicine and Health, The University of Manchester, Oxford Road, Manchester M13 9PL, United Kingdom

# Joint senior authors

* To whom correspondence should be addressed at:

Centre for Biostatistics, Division of Population Health, Health Services Research & Primary Care, School of Health Sciences, Faculty of Biology, Medicine and Health, The University of Manchester, Oxford Road, Manchester M13 9PL, United Kingdom

Tel: 44 (0) 1613 068003

E-mail: hui.guo@manchester.ac.uk

**Traits including and excluding criteria for the phenome-wide Mendelian randomization study**

1. We include disease codes from PHESANT, FinnGen and ICD10 sources. Certain diseases such as injuries, chromosomal abnormalities and gender-determined diseases are excluded. For example, the following codes are excluded from ICD-10 sources:

O00-O9A Pregnancy, childbirth and the puerperium

P00-P96 Certain conditions originating in the perinatal period

Q00-Q99 Congenital malformations, deformations and chromosomal abnormalities

S00-T88 Injury, poisoning and certain other consequences of external causes

V00-Y99 External causes of morbidity

Z00-Z99 Factors influencing health status and contact with health services

The similar traits coded from FinnGen and PHESANT were also removed.

1. biomarkers, symptoms, signs

We also included the biomarker-related traits, such as symptoms (e.g., knee pain) and body function measurements (e.g., heel density, FEV1). The transient function measurements (e.g., lab-test, Microalbumin in urine, blood cell count, creatinine (quantile)) which cannot represent the long-term health were removed.

2.1 signs (e.g., snoring, knee pain)

2.2 symptoms (e.g., weight change during anxiety/ depression)

2.3 biomarkers

2.4 function measurement (e.g., FEV1)

2.5 disease diagnosed age (e.g., age hypertension diagnosed at)

2.6 exposure (e.g., smoked/drink, only alcohol/tobacco dependency were included)

2.7 physical measurement (e.g., heel bone mineral density, BMI)

1. All other irrelevant traits were removed from the downstream analysis. The full trait list that was included in the study can be found in the supplementary tableS3.

3.1 food (e.g., milk consumption, coffee intake)

3.2 activity (e.g., exercise)

3.3 environment/social status（e.g., home location/pollution, employment）

3.4 experience (e.g., year lived in a region)

3.5 irrelevant signs, measurement (e.g., hair colour, skin colour, arm length)

3.6 treatment (e.g., medication, surgeries)

3.7 time to complete (time to complete the test)

3.8 illness of others (e.g., Alzheimer's of mother)

3.9 reasons (e.g., reasons for doing things)
