# Supplementary material for: Exploring the possible causal role of the immune response to varicella-zoster virus on multiple traits: a phenome-wide Mendelian randomization study
Source: bioRxiv or medRxiv preprint supplement (doi:10.1101/2022.07.29.22278202), 2022-07-31

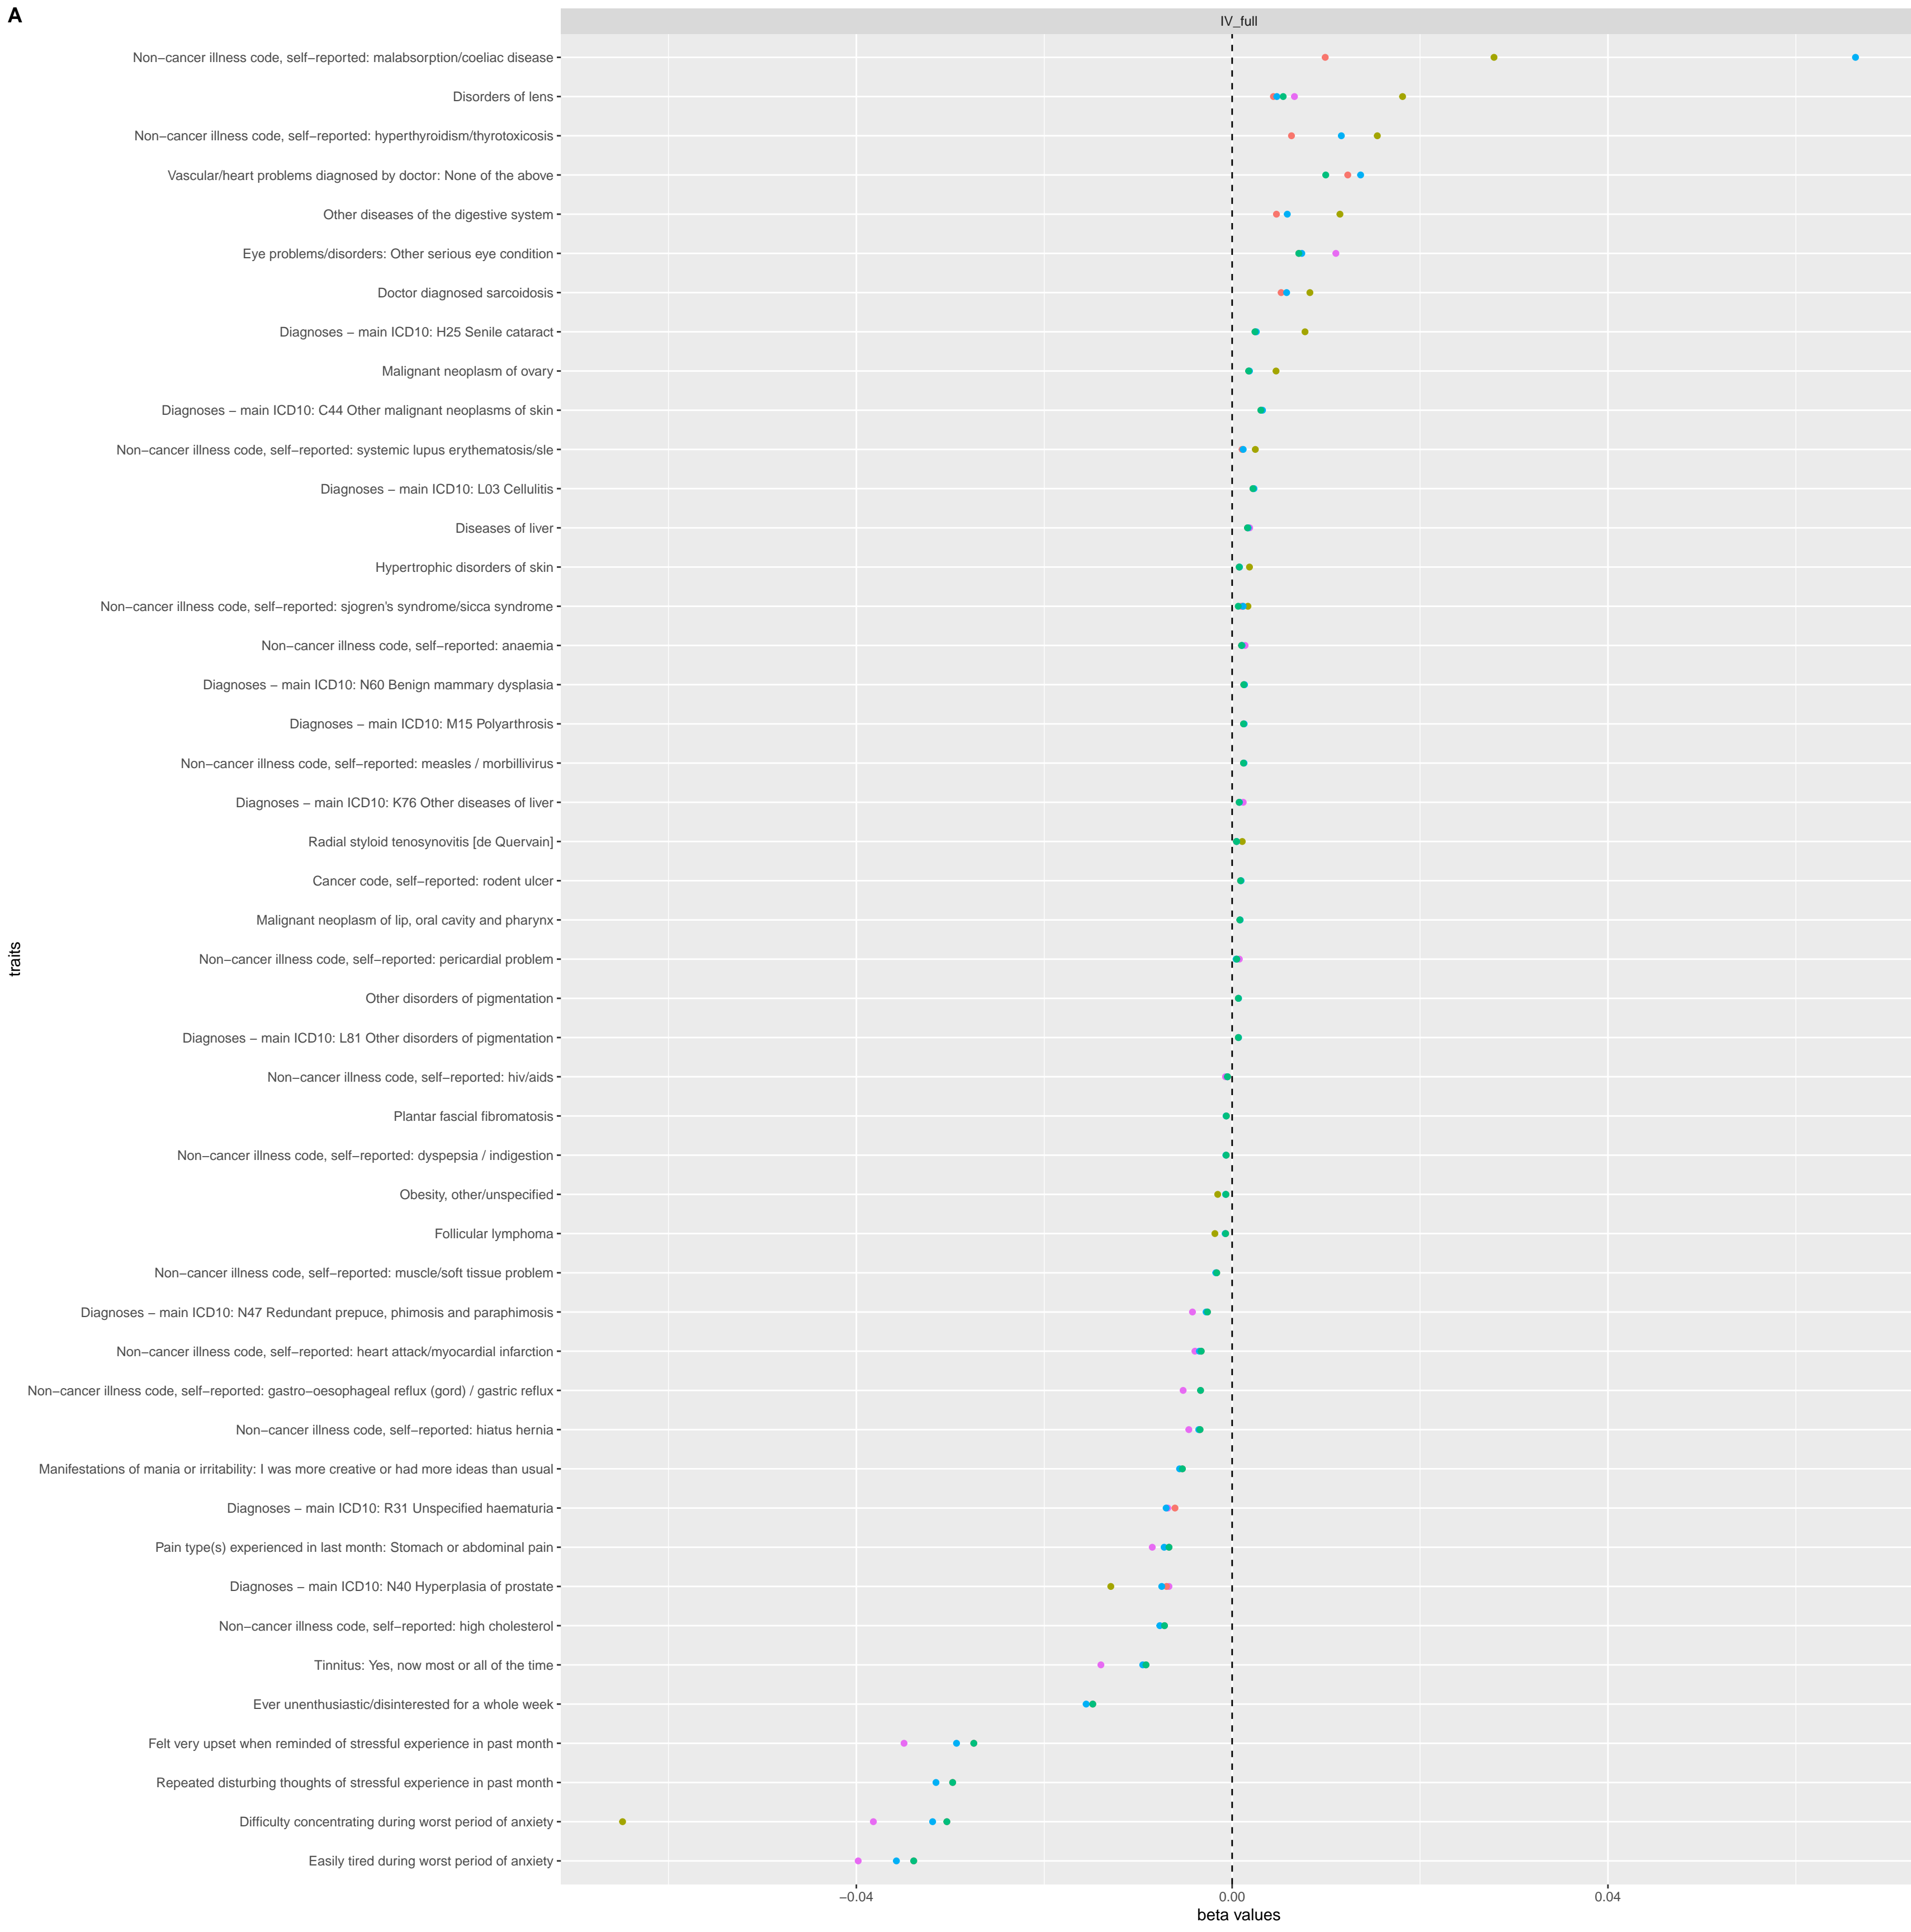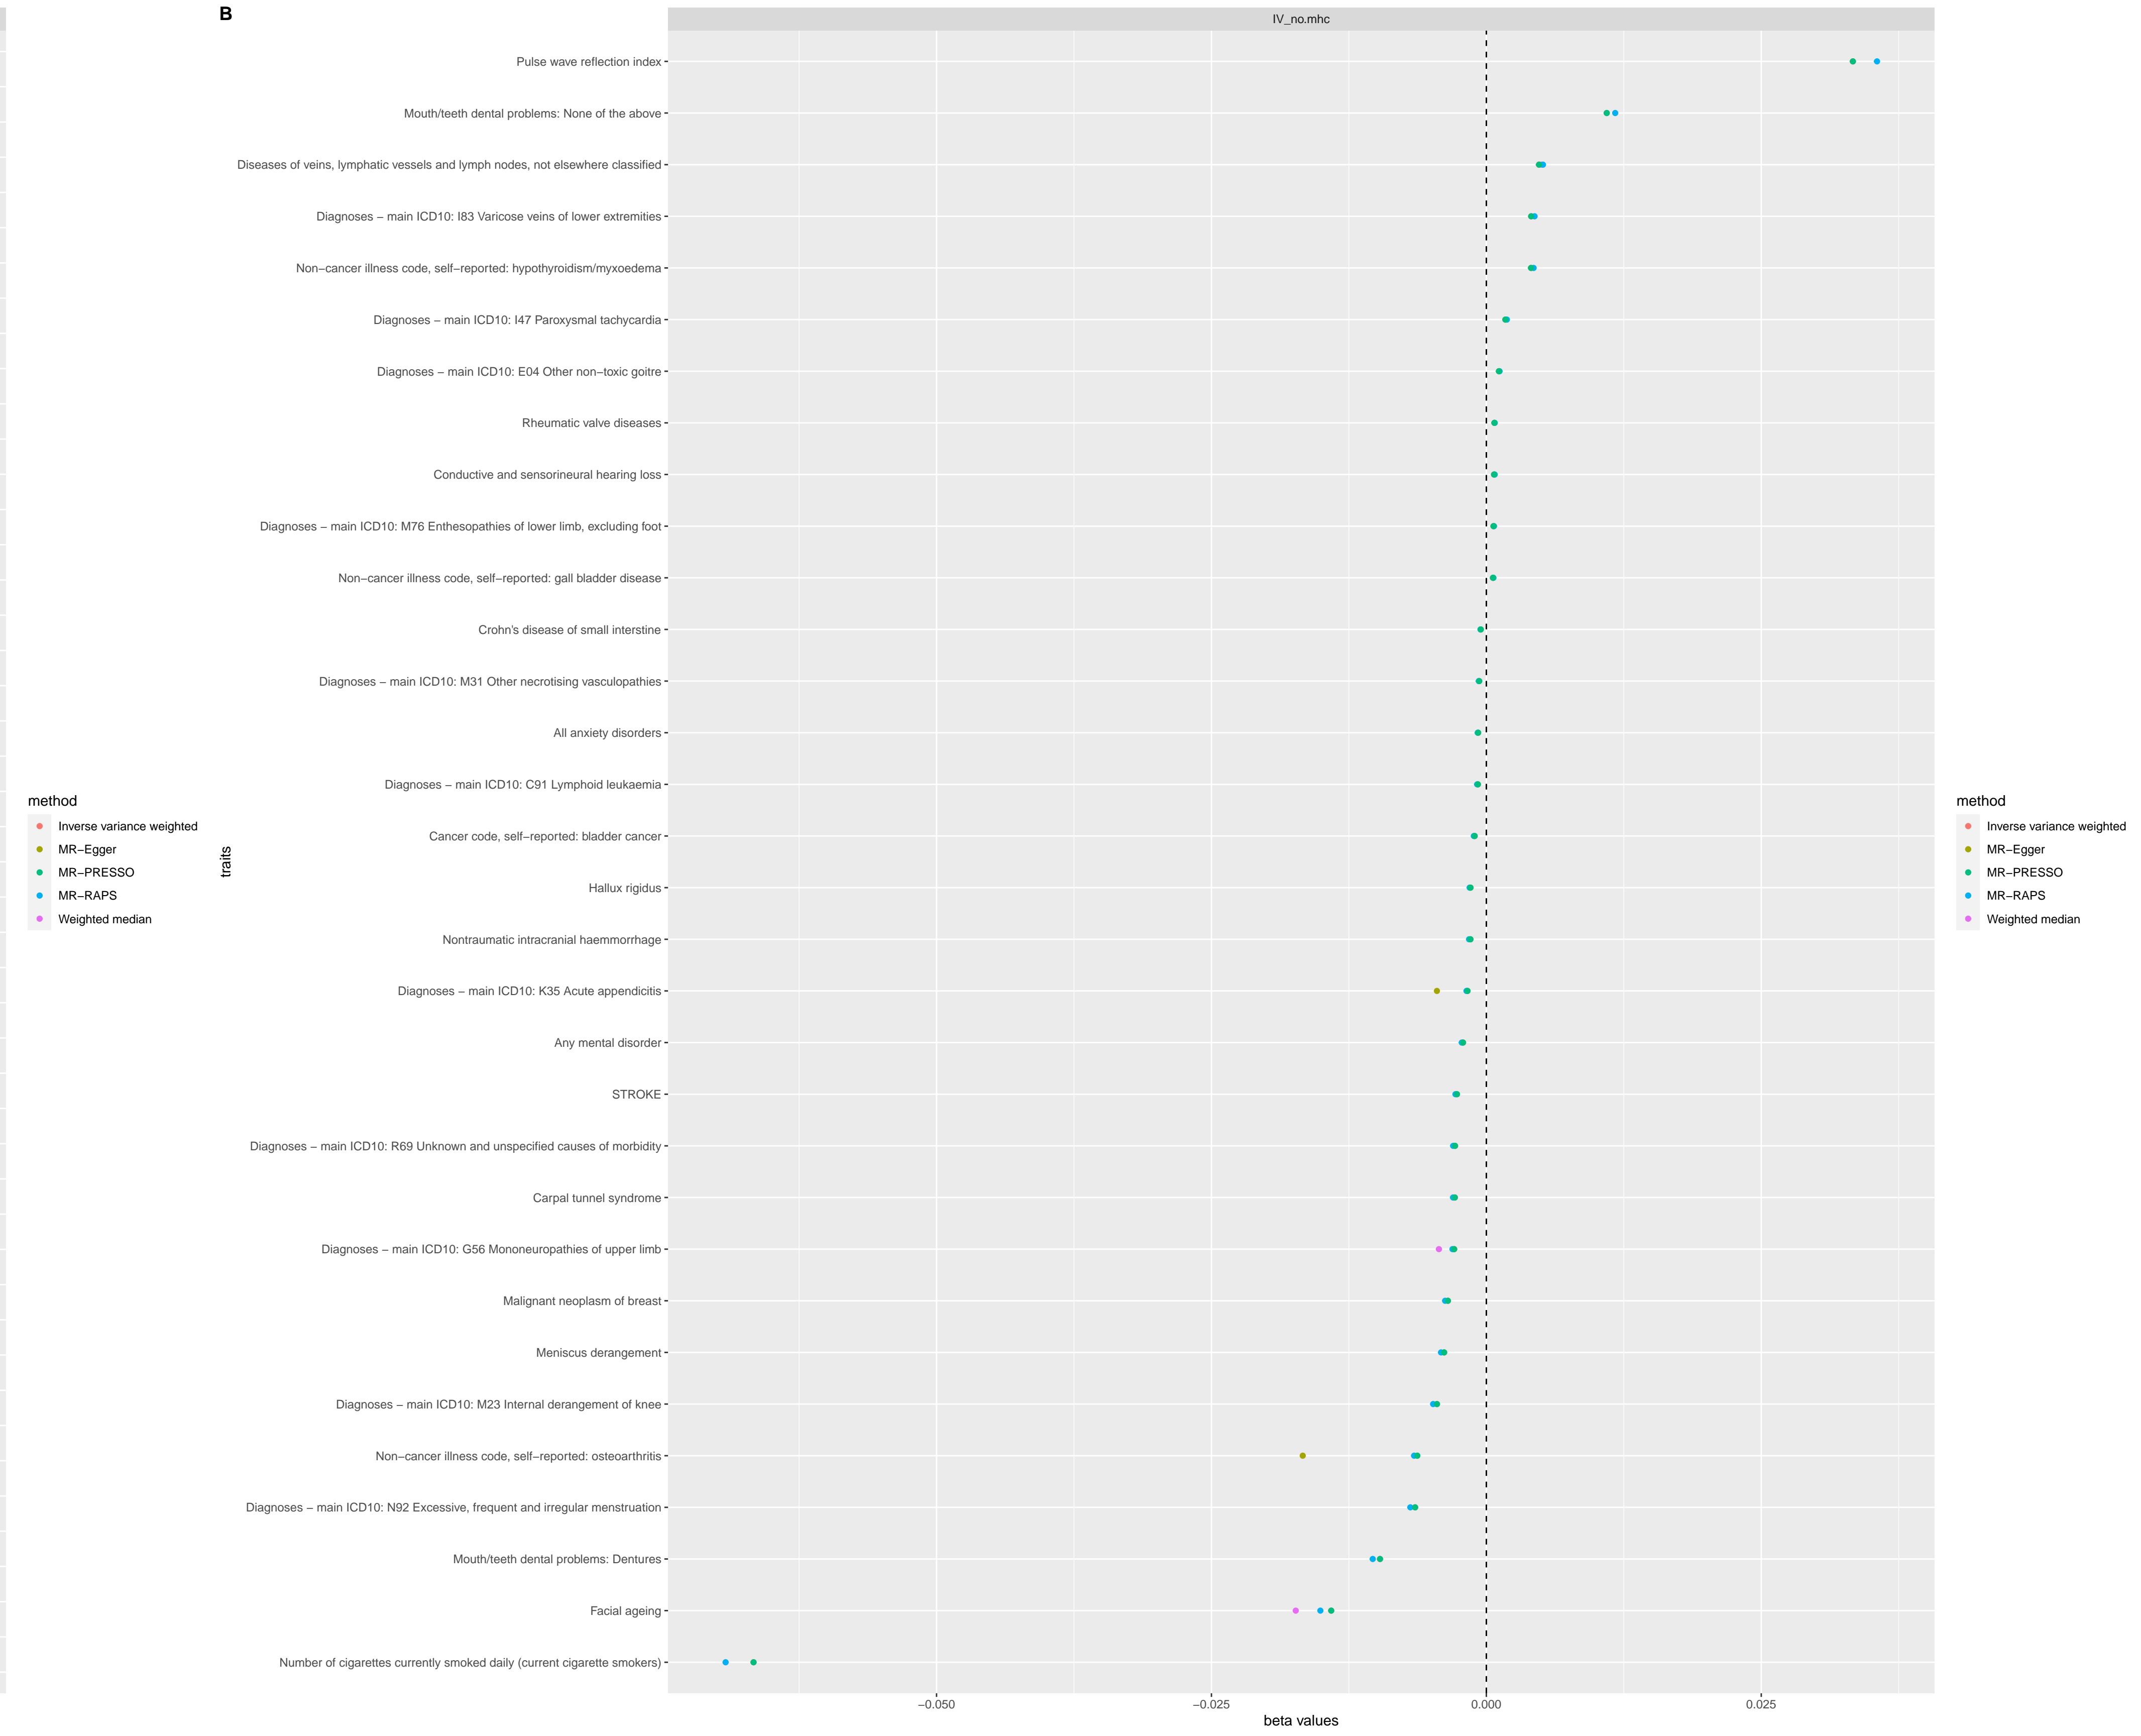

Supplement: Supplementary file [file media-2.pdf]
